# Supplementary material
Source: PubMed Central journal article supplement (PMC10187990)

# THE LANCET

## Digital Health

### Supplementary appendix

This appendix formed part of the original submission and has been peer reviewed. We post it as supplied by the authors.

Supplement to: Canas LS, Molteni E, Deng J, et al. Profiling post-COVID-19 condition across different variants of SARS-CoV-2: a prospective longitudinal study in unvaccinated wild-type, unvaccinated alpha-variant, and vaccinated delta-variant populations. *Lancet Digit Health* 2023; published online May 16. [https://doi.org/10.1016/S2589-7500\(23\)00056-0](https://doi.org/10.1016/S2589-7500(23)00056-0).

## Supplementary Material

|                                                                                                                                                                                                   |    |
|---------------------------------------------------------------------------------------------------------------------------------------------------------------------------------------------------|----|
| Supplementary Material.....                                                                                                                                                                       | 1  |
| App description and development.....                                                                                                                                                              | 3  |
| Supplementary Methods .....                                                                                                                                                                       | 3  |
| Table S1. List of symptom and comorbidity questions asked in the COVID Symptom Study application during the current study period. ....                                                            | 3  |
| Table S2. List of questions from CSSB Long-COVID questionnaire included in the study. ....                                                                                                        | 6  |
| Figure S1. SARS-CoV-2 variants of concern in the UK by weeks, from 15 <sup>th</sup> of March 2020 to 3 <sup>rd</sup> of March 2022. ....                                                          | 7  |
| Figure S2. Flowchart of participants satisfying the inclusion and exclusion criteria for this study. ..                                                                                           | 7  |
| Figure S3. Framework to assess model robustness.....                                                                                                                                              | 9  |
| <br>                                                                                                                                                                                              |    |
| Supplementary Results.....                                                                                                                                                                        | 10 |
| Table S3. Description of the population with an invalid logging profile (not identifiable healthy status) and valid logging profile (with respect to the inclusion criteria).....                 | 10 |
| Illness duration encodes the disease duration per patient from the self-reported symptoms. ....                                                                                                   | 10 |
| Table S4. Symptoms prevalence for vaccinated and unvaccinated populations, per SARS-CoV-2 variant. ....                                                                                           | 12 |
| Table S5. Illness description for the post-COVID syndrome across clusters and variants.....                                                                                                       | 14 |
| Figure S4. Spearman correlation matrix self-reported symptoms.....                                                                                                                                | 16 |
| Figure S5. Symptom prevalence and duration for subjects reporting PCS.....                                                                                                                        | 17 |
| Figure S6. Optimisation of BIC to select the best number of clusters per SARS-CoV-2 variant.....                                                                                                  | 17 |
| Figure S7. Significance analysis of symptoms profiles per cluster for the wild-type variant of the virus, for symptomatic disease longer than 12 weeks.....                                       | 18 |
| Figure S8. Demographic profile per cluster for the wild-type variant of the virus, for symptomatic disease longer than 12 weeks. ....                                                             | 18 |
| Figure S9. Individual profile for the clusters optimised for the wild-type variant for subjects with the symptomatic disease for longer than 12 weeks.....                                        | 19 |
| Figure S10. Symptom prevalence profile for PCS clusters for unvaccinated subjects infected with the alpha variant.....                                                                            | 20 |
| Figure S11. Significance analysis of symptoms profiles per cluster for the alpha variant of the virus, for symptomatic disease longer than 12 weeks.....                                          | 21 |
| Figure S12. Individual profile for the clusters optimised for the unvaccinated alpha variant for subjects with the symptomatic disease for longer than 12 weeks.....                              | 22 |
| Figure S13. Demographic profile per cluster for the unvaccinated alpha variant of the virus, for symptomatic disease longer than 12 weeks. ....                                                   | 23 |
| Figure S14. Symptom prevalence profile for PCS clusters for vaccinated individuals infected with the delta variant.....                                                                           | 24 |
| Figure S15. Significance analysis of symptoms profiles per cluster for the vaccinated delta variant of the virus, for symptomatic disease longer than 12 weeks, for vaccinated subjects. ....     | 25 |
| Figure S16. Individual profile for the clusters optimised for vaccinated delta variant for subjects, who were infected after vaccination, with symptomatic lasting for longer than 12 weeks. .... | 26 |

Figure S17. Demographic profile per cluster for the vaccinated delta variant of the virus, for symptomatic disease longer than 12 weeks. .... 27

Figure S18. Comorbidity profile per cluster for the three variants of the virus, for symptomatic disease longer than 12 weeks. .... 28

Figure S19. Symptom prevalence profile for the cluster prediction for the independent sample composed unvaccinated individuals infected by the wild-type variant with symptomatic illness for longer than 12 weeks. .... 29

Figure S20. Robustness evaluation of the clusters for wild-type..... 30

## App description and development

In this prospective cohort study, data were acquired from CSS, through a mobile application for iPhone® and Android® users launched jointly by ZOE Limited. and KCL on 24 March 2020. 15 The COVID Symptoms Study app was tested before its launch, as well as before the release of any new version; software for repeatable and consistent data extraction, curation, and analytics was also engineered.<sup>48</sup>

The app is concurrently available to be downloaded to Android and iOS, in both English and Swedish, and available in the UK, US, and Sweden. The app was widely publicised in these countries during the peak of the pandemic, and new functionalities were added when appropriate to address the needs of the population, such as the registration of side-effects of the vaccination. Additionally, to keep the users engaged with the study, daily and weekly updates regarding research conducted using the data collected via the app are provided to participants (with notification through the app, email alerts, and posted on the website of the ZOE COVID Study ([joinzoe.com](http://joinzoe.com))).

## Supplementary Methods

**Table S1. List of symptom and comorbidity questions asked in the COVID Symptom Study application during the current study period.**

| Symptom          | COVID Symptom Study app question                                                                                                                                                                                                                   | Date of addition to the app | Symptom group            |
|------------------|----------------------------------------------------------------------------------------------------------------------------------------------------------------------------------------------------------------------------------------------------|-----------------------------|--------------------------|
| Fever            | Fever (at least 37.8C or 100F)                                                                                                                                                                                                                     | 2020-03-29                  | Systemic/inflammatory    |
| Persistent Cough | A persistent cough (coughing a lot for more than an hour or 3 or more coughing episodes in 24 hours)                                                                                                                                               | 2020-03-29                  | Cardiorespiratory        |
| Fatigue          | Unusual fatigue (no; mild fatigue; severe fatigue/ I struggle to get out of bed)                                                                                                                                                                   | 2020-03-29                  | Systemic/inflammatory    |
| Dyspnoea         | Shortness of breath or trouble breathing (no; yes mild symptoms/ slight shortness of breath during ordinary activity; yes significant symptoms/ breathing is comfortable only at rest; yes, severe symptoms/ breathing is difficult even at rest). | 2020-03-29                  | Upper respiratory        |
| Anosmia/Ageusia  | Loss of smell/taste                                                                                                                                                                                                                                | 2020-03-29                  | Central neurological     |
| Hoarse Voice     | Unusually hoarse voice                                                                                                                                                                                                                             | 2020-03-29                  | Upper respiratory        |
| Chest Pain       | Unusual chest pain or tightness in your chest                                                                                                                                                                                                      | 2020-03-29                  | Cardiorespiratory        |
| Abdominal Pain   | Unusual abdominal pain or stomach-ache                                                                                                                                                                                                             | 2020-03-29                  | Abdominal                |
| Diarrhoea        | Diarrhoea                                                                                                                                                                                                                                          | 2020-03-29                  | Abdominal                |
| Delirium         | Confusion, disorientation or drowsiness                                                                                                                                                                                                            | 2020-03-29                  | Central neurological     |
| Eye Soreness     | Do your eyes have any unusual eye soreness or discomfort (e.g. light sensitivity, excessive tears, or pink/red eye)?                                                                                                                               | 2020-04-29                  | Immune related/cutaneous |

|                         |                                                                             |            |                          |
|-------------------------|-----------------------------------------------------------------------------|------------|--------------------------|
| Low appetite (anorexia) | Skipping meals                                                              | 2020-04-29 | Systemic/inflammatory    |
| Headache                | Headache                                                                    | 2020-03-29 | Central neurological     |
| Nausea                  | Nausea or vomiting                                                          | 2020-03-29 | Systemic/inflammatory    |
| Dizziness               | Dizziness or light-headedness                                               | 2020-04-29 | Systemic/inflammatory    |
| Sore Throat             | Sore or painful throat                                                      | 2020-03-29 | Upper respiratory        |
| Myalgias                | Unusual strong muscle pains or aches                                        | 2020-04-01 | Systemic/inflammatory    |
| Red Welts               | Raised, red, itchy welts on the skin or sudden swelling of the face or lips | 2020-11-03 | Immune related/cutaneous |
| Blisters                | Red/purple sores or blisters on your feet, including your toes              | 2020-04-29 | Immune related/cutaneous |
| Rashes                  | Rash on your arms or torso                                                  | 2020-11-03 | Immune related/cutaneous |
| Sensitive Skin          | Strange, unpleasant sensations in your skin like pins & needles or burning  | 2020-11-03 | Immune related/cutaneous |
| Hair Loss               | Unusual hair loss                                                           | 2020-11-03 | Immune related/cutaneous |
| Low mood (depression)   | Feeling down, depressed, or hopeless                                        | 2020-11-03 | Central neurological     |
| Brain Fog               | Loss of concentration or memory (brain fog)                                 | 2020-11-03 | Central neurological     |
| Dysosmia/Dysgeusia      | Altered smell/taste (things smell or taste different to usual)              | 2020-11-03 | Central neurological     |
| Rhinorrhoea             | Runny nose                                                                  | 2020-11-03 | Upper respiratory        |
| Sneezing                | Sneezing more than usual                                                    | 2020-11-03 | Upper respiratory        |
| Ear Pain                | Earache                                                                     | 2020-11-03 | Upper respiratory        |
| Tinnitus                | Ringing in your ears                                                        | 2020-11-03 | Upper respiratory        |
| Lymphadenopathy         | Swollen neck glands                                                         | 2020-11-03 | Systemic/inflammatory    |
| Palpitations            | Unusually fast or irregular heartbeat (palpitations)                        | 2020-11-03 | Cardiorespiratory        |
| <b>Comorbidities</b>    |                                                                             |            |                          |
| Diabetes                | Do you have diabetes?                                                       | 2020-06-05 | N/A                      |

|                |                                     |            |     |
|----------------|-------------------------------------|------------|-----|
| Cancer         | Are you living with cancer?         | 2020-06-05 | N/A |
| Lung Disease   | Do you have lung disease or asthma? | 2020-06-05 | N/A |
| Heart Disease  | Do you have heart disease?          | 2020-06-05 | N/A |
| Kidney Disease | Do you have kidney disease?         | 2020-06-05 | N/A |

**Table S2. List of questions from CSSB Long-COVID questionnaire included in the study.**

| Outcome                              | Question                                                                                                                                                              | Answer                                                                                                                                                                                                                                                                                                                                                                                                                                                                                    | Answer Encoding                                                                                       |
|--------------------------------------|-----------------------------------------------------------------------------------------------------------------------------------------------------------------------|-------------------------------------------------------------------------------------------------------------------------------------------------------------------------------------------------------------------------------------------------------------------------------------------------------------------------------------------------------------------------------------------------------------------------------------------------------------------------------------------|-------------------------------------------------------------------------------------------------------|
| Early Medical help                   | Q.B.5 In the <u>first 4 weeks</u> of illness, did you look for any medical help for any symptoms you think may have been caused by COVID-19?                          | Yes - discussed symptoms with doctor/GP/practice nurse<br>Yes - discussed symptoms with NHS 111 in England, Wales and Northern Ireland or NHS 24 in Scotland<br>Yes - accessed online advice at NHS 111 in England, Wales and Northern Ireland or NHS 24 in Scotland<br>Yes - visited pharmacist<br>Yes - visited A&E or walk-in centre<br>No                                                                                                                                             | Yes (1-5) – encoded as 1<br>No (6) – encoded as 0                                                     |
| Delayed Medical help                 | Q.B.6 Did you look for any medical help for any symptoms you had <u>more than 4 weeks</u> after your symptoms began, that you think may have been caused by COVID-19? | Yes - discussed symptoms with doctor/GP/practice nurse<br>Yes - discussed symptoms with NHS 111 in England, Wales and Northern Ireland or NHS 24 in Scotland<br>Yes - accessed online advice at NHS 111 in England, Wales and Northern Ireland or NHS 24 in Scotland<br>Yes - visited pharmacist<br>Yes - visited A&E or walk-in centre<br>No                                                                                                                                             | Yes (1-5) – encoded as 1<br>No (6) – encoded as 0                                                     |
| Hospitalisation                      | Q.B.7 Have you ever had to stay in hospital because of COVID-19 symptoms?                                                                                             | Yes<br>No                                                                                                                                                                                                                                                                                                                                                                                                                                                                                 | Yes (1) – encoded as 1<br>No (2) – encoded as 0                                                       |
| Re-infection                         | Q.B.8 Do you think you have caught COVID-19 more than once?                                                                                                           | Yes, confirmed by a second positive test<br>Yes, based on medical advice<br>Yes, based on strong personal suspicion<br>Unsure<br>No                                                                                                                                                                                                                                                                                                                                                       | Yes (1 – 2) – encoded as 1<br>No (5) – encoded as 0<br><br>Excluded (3-4) for absence of clear answer |
| Severe impact on daily activities    | Q.B.13 How many days were you or have you been so unwell that you stayed in bed or on the sofa?                                                                       | None<br>1-3 days<br>4-6 days<br>7-13 days<br>2-3 weeks<br>4-12 weeks<br>12+ weeks                                                                                                                                                                                                                                                                                                                                                                                                         | Yes (6-7) – encoded as 1, reflecting OCS and PCS<br>No (1-5) – encoded as 0                           |
| Prolonged impact in daily activities | Q.B.16 Thinking of how you felt 12 weeks after your COVID-19 illness began, what did you need help with because of COVID-19?                                          | Getting essential shopping - e.g., food or medication<br>Preparing food and/or drink<br>Washing and dressing<br>Housework - e.g., laundry, cleaning or hoovering<br>Managing household responsibilities - e.g., finances or paying bills<br>Day to day work / study<br>Childcare or other caring responsibilities<br>Letting other people know about my illness (e.g. employer, university, family)<br>Getting about (travel) - e.g., driving<br>I have not needed any additional support | Yes (1 – 9) – encoded as 1<br>No (10) – encoded as 0                                                  |

**Figure S1. SARS-CoV-2 variants of concern in the UK by weeks, from 15<sup>th</sup> of March 2020 to 3<sup>rd</sup> of March 2022.** Figure adapted from COG-UK/Mutation Explorer34. The variant periods are defined when the prevalence of the variant is higher than 80%. Variant sub-lineages are neglected and analysed as a single variant.

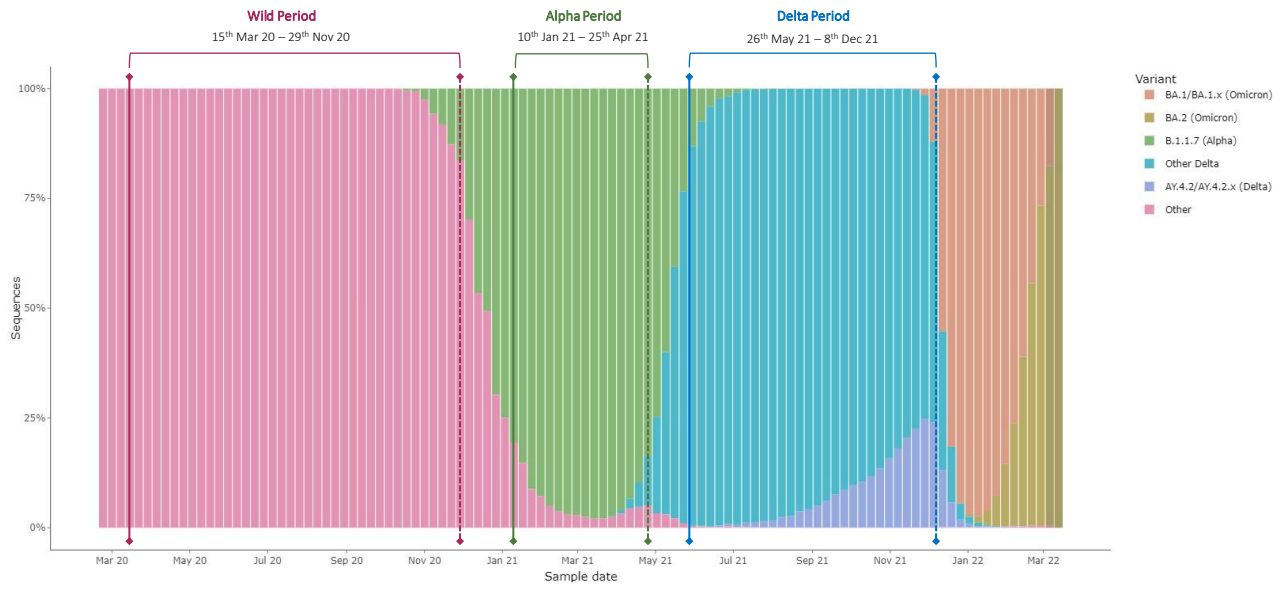



**Figure S2. Flowchart of participants satisfying the inclusion and exclusion criteria for this study.** The candidates were included the study if reporting a positive test following logging as healthy for at least 4 weeks (\*). Individuals who reported symptom duration for at least 28 days were then retained according to inclusion/exclusion criteria. Individuals were further subdivided according to the timing of SARS-CoV-2 infection relative to vaccination: vaccinated (considered from at least one week after the first dose) and unvaccinated (infection prior to the first dose of vaccine). Parsing of individuals by variant type is defined by positive testing during time periods where the prevailing UK strain was  $\geq 80\%$  of circulating SARS-CoV-2, using UK-COG data (see text for details). CSSB: COVID Symptoms Study Biobank; PCS: post-COVID syndrome.

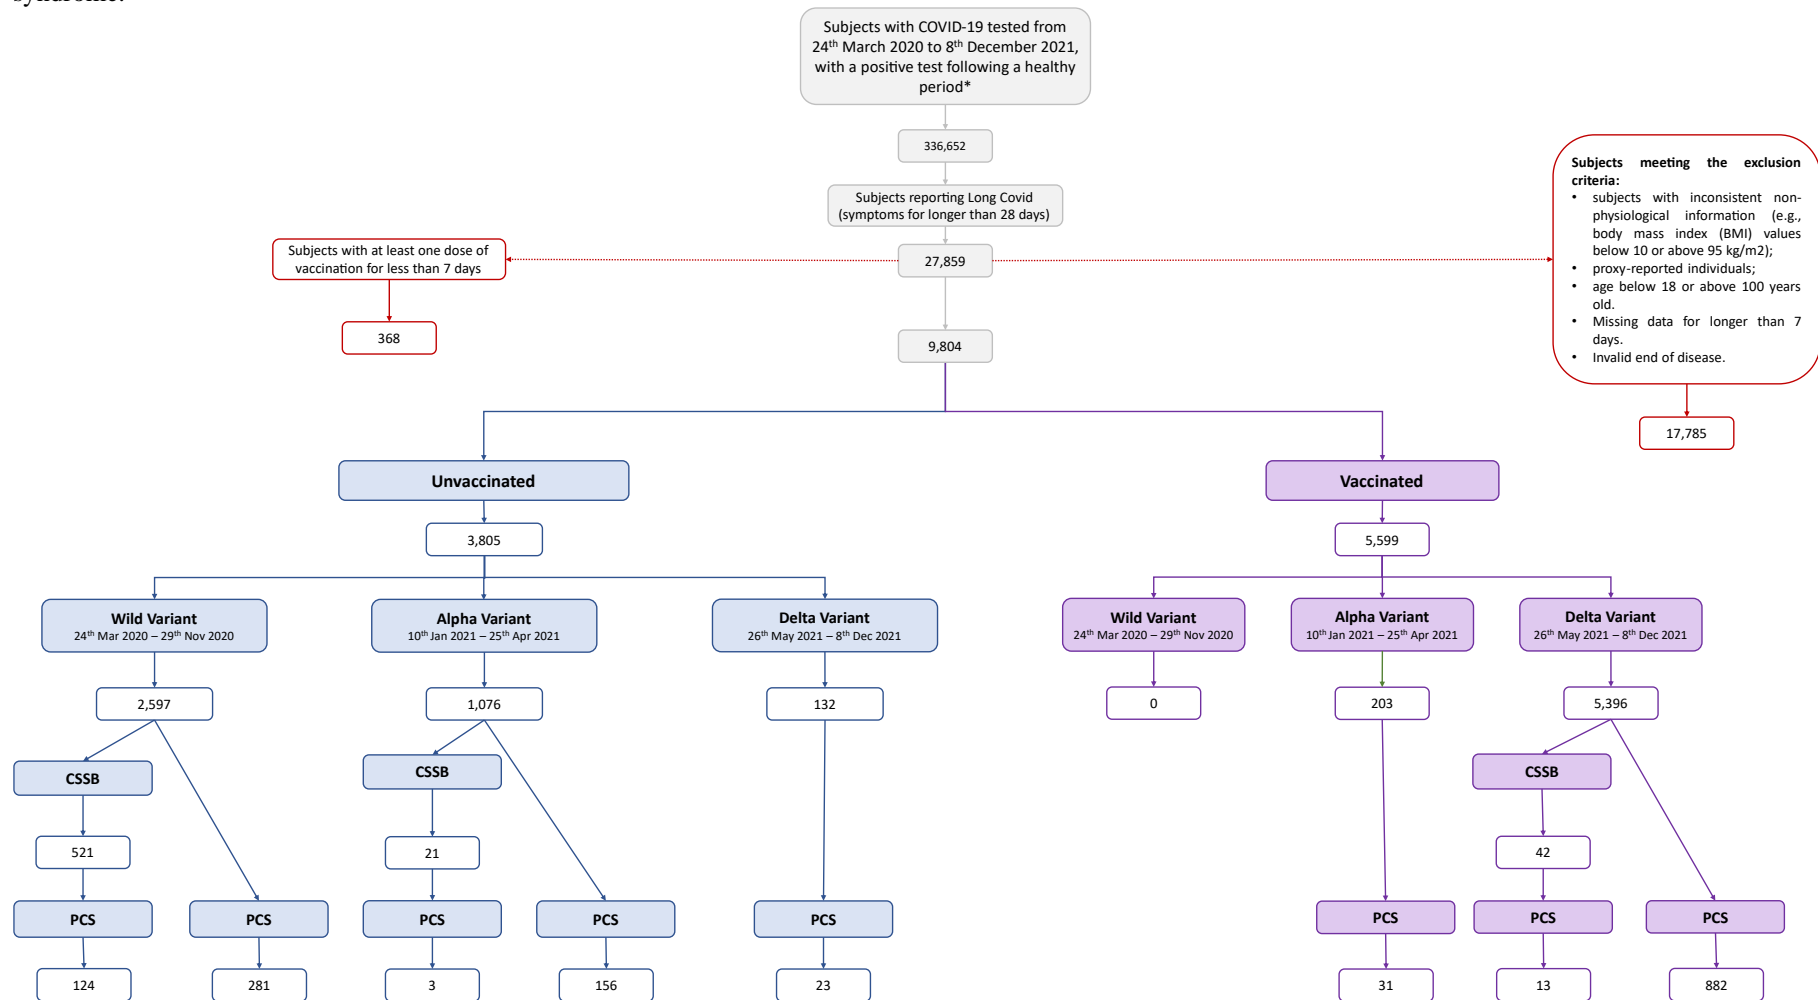

**Figure S3. Framework to assess model robustness.** The blue area represents the original training scheme, applied for cluster estimation per population and vaccination status. M-1 represents the optimised model from the training set. The yellow area encodes the re-trained model on the testing set – M-2. The predicted labels, C, for the testing set using the model M-1 are compared with labels predicted for the testing set using M-2, C'. CSS: COVID Symptoms Study. CSSB: COVID Symptoms Study Biobank. bACC: Balanced Accuracy.

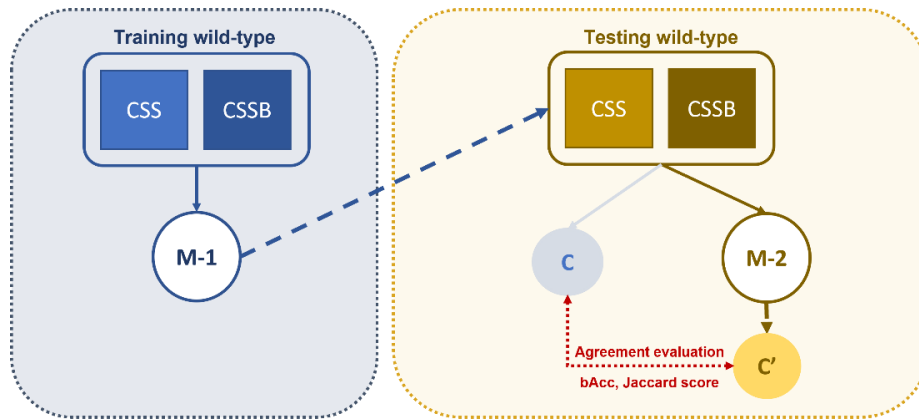

## Supplementary Results

**Table S3. Description of the population with an invalid logging profile (not identifiable healthy status) and valid logging profile (with respect to the inclusion criteria).** Illness duration encodes the disease duration per patient from the self-reported symptoms. The illness duration and symptoms per week are presented with the median and interquartile range (IQR). Bold values encode statistical significance using the Mann-Whitney test between the invalid and valid logging within the same period, with \* and \*\* encoding p-value<0.05 and p-value<0.01, respectively.

| Illness duration 28-83 days |                    |                          |                                      |                             |                   |                          |                           |                    |                          |                             |                                      |             |                          |                           |
|-----------------------------|--------------------|--------------------------|--------------------------------------|-----------------------------|-------------------|--------------------------|---------------------------|--------------------|--------------------------|-----------------------------|--------------------------------------|-------------|--------------------------|---------------------------|
| Invalid logging             |                    |                          |                                      |                             |                   |                          |                           | Valid logging      |                          |                             |                                      |             |                          |                           |
|                             | Number of subjects | Illness duration (weeks) | Proportion of reports during disease | Number of symptoms per week | Age (years)       | BMI (kg/m <sup>2</sup> ) | Gender (proportion males) | Number of subjects | Illness duration (weeks) | Number of symptoms per week | Proportion of reports during disease | Age (years) | BMI (kg/m <sup>2</sup> ) | Gender (proportion males) |
| Wild type                   | 142                | 5 [4; 6]                 | <b>0.52 [0.40; 0.63]*</b>            | 5 [3; 8]                    | 52.0 [41.0; 60.0] | 27.8 [23.7; 32.8]        | 40 (0.28)                 | 2,192              | 5 [4; 6]                 | 3 [2; 6]                    | <b>0.57 [0.43; 0.71]*</b>            | 54 [45; 62] | 26.5 [23.4; 31.1]        | 586 (0.27)                |
| Alpha                       | 36                 | 5 [4; 7]                 | <b>0.51 [0.37; 0.60]**</b>           | 5 [3; 9]                    | 54 [45; 59]       | 26.2 [24.1; 28.8]        | 12 (0.33)                 | 917                | 5 [4; 6]                 | 5 [2; 9]                    | <b>0.60 [0.44; 0.74]**</b>           | 56 [49; 63] | 26.1 [23.5; 29.9]        | 280 (0.31)                |
| Delta                       | 133                | 5 [4; 7]                 | <b>0.54 [0.43; 0.69]*</b>            | 3 [5; 9]                    | 55.0 [46.0; 61.0] | 25.8 [23.6; 30.0]        | 44 (0.33)                 | 4,501              | 5 [4; 7]                 | 4 [2; 8]                    | <b>0.59 [0.42; 0.73]*</b>            | 55 [48; 64] | 26.0 [23.2; 29.9]        | 1475 (0.33)               |
| Illness duration >= 84 days |                    |                          |                                      |                             |                   |                          |                           |                    |                          |                             |                                      |             |                          |                           |
| Invalid logging             |                    |                          |                                      |                             |                   |                          |                           | Valid logging      |                          |                             |                                      |             |                          |                           |
|                             | Number of subjects | Illness duration (weeks) | Proportion of reports during disease | Number of symptoms per week | Age (years)       | BMI (kg/m <sup>2</sup> ) | Gender (proportion males) | Number of subjects | Illness duration (weeks) | Number of symptoms per week | Proportion of reports during disease | Age (years) | BMI (kg/m <sup>2</sup> ) | Gender (proportion males) |

|                  |     |                      |                            |          |                   |                   |            |     |                      |          |                            |             |                   |            |
|------------------|-----|----------------------|----------------------------|----------|-------------------|-------------------|------------|-----|----------------------|----------|----------------------------|-------------|-------------------|------------|
| <b>Wild type</b> | 101 | <b>73 [46; 76]**</b> | <b>0.74 [0.62; 0.81]**</b> | 3 [1; 5] | 56.0 [46.0; 65.0] | 26.3 [24.2; 32.1] | 33 (0.33)  | 405 | <b>19 [14; 30]**</b> | 2 [1; 4] | <b>0.65 [0.54; 0.75]**</b> | 58 [50; 65] | 26.3 [23.5; 31.8] | 107 (0.26) |
| <b>Alpha</b>     | 53  | <b>59 [39; 62]**</b> | <b>0.75 [0.65; 0.83]*</b>  | 4 [2; 8] | 58 [52; 64]       | 27.6 [23.0; 30.5] | 18 (0.34)  | 159 | <b>16 [14; 20]**</b> | 4 [2; 6] | <b>0.68 [0.56; 0.80]*</b>  | 58 [52; 65] | 26.5 [23.1; 30.3] | 46 (0.29)  |
| <b>Delta</b>     | 457 | <b>19 [23; 29]**</b> | <b>0.69 [0.58; 0.78]*</b>  | 4 [2; 7] | 59.0 [52.0; 66.0] | 26.0 [23.1; 29.9] | 166 (0.36) | 895 | <b>15 [13; 18]**</b> | 3 [2; 7] | <b>0.67 [0.53; 0.78]*</b>  | 59 [52; 66] | 26.0 [23.1; 29.9] | 300 (0.34) |

**Table S4. Symptoms prevalence for vaccinated and unvaccinated populations, per SARS-CoV-2 variant, for individuals with symptoms longer than 28 days (ongoing COVID, OCS, and post-COVID syndrome, PCS).**

Mann-Whitney two-sided test was used to assess the differences between the two groups, per variant of the virus. Alpha = 0.05, before multiple corrections. Bold encode significant differences, after multiple corrections (alpha corrected = 0.001).

| Symptoms         | Alpha Variant           |         |                   |                     | Delta Variant           |         |                   |                     |
|------------------|-------------------------|---------|-------------------|---------------------|-------------------------|---------|-------------------|---------------------|
|                  | Statistics (vaccinated) | p-value | Number vaccinated | Number unvaccinated | Statistics (vaccinated) | p-value | Number vaccinated | Number unvaccinated |
| Persistent Cough | 40111                   | 0.331   | 118               | 720                 | 177844                  | 0.452   | 3798              | 98                  |
| Dizziness        | 33993                   | 0.060   | 114               | 670                 | 105051                  | 0.977   | 2924              | 72                  |
| Palpitations     | 5503.5                  | 0.995   | 44                | 250                 | 9629.5                  | 0.412   | 930               | 23                  |
| Dyspnoea         | 24284.5                 | 0.661   | 85                | 555                 | 60218                   | 0.174   | 2318              | 58                  |
| Chest Pain       | 16781                   | 0.037   | 82                | 478                 | 63531.5                 | 0.159   | 1914              | 60                  |
| Hoarse voice     | 22247.5                 | 0.805   | 95                | 476                 | 83509.5                 | 0.953   | 2726              | 61                  |
| Sore throat      | 38185.5                 | 0.030   | 126               | 690                 | 157143                  | 0.690   | 3485              | 88                  |
| Eyes soreness    | 18304                   | 0.705   | 76                | 469                 | 67597.5                 | 0.514   | 2258              | 57                  |
| Rhinorrhoea      | 62384.5                 | 0.020   | 176               | 798                 | 261685                  | 0.072   | 4737              | 100                 |
| Sneezing         | 48494                   | 0.916   | 146               | 668                 | 146331                  | 0.360   | 4224              | 65                  |
| Earache          | 6696                    | 0.905   | 48                | 276                 | 18323.5                 | 0.416   | 1493              | 27                  |
| Tinnitus         | 11606.5                 | 0.291   | 63                | 340                 | 26404.5                 | 0.529   | 1764              | 28                  |
| Fatigue          | 103894.5                | 0.814   | 197               | 1066                | 354136                  | 0.057   | 5076              | 127                 |
| Delirium         | 4378.5                  | 0.240   | 39                | 254                 | 18204.5                 | 0.951   | 1145              | 32                  |
| Dysomnia         | 39057.5                 | 0.091   | 116               | 746                 | 179083                  | 0.964   | 3741              | 96                  |
| Anosmia          | 24461                   | 0.083   | 80                | 546                 | 225144                  | 0.718   | 4124              | 107                 |
| Headache         | 86060                   | 0.487   | 179               | 994                 | 290022.5                | 0.085   | 4730              | 112                 |
| Brain Fog        | 26892.5                 | 0.327   | 100               | 573                 | 86311.5                 | 0.791   | 2775              | 61                  |
| Depression       | 16766                   | 0.161   | 78                | 477                 | 51245                   | 0.350   | 1903              | 50                  |
| Diarrhoea        | 11917                   | 0.258   | 61                | 429                 | 38476                   | 0.310   | 1606              | 44                  |
| Abdominal Pain   | 11516.5                 | 0.931   | 61                | 375                 | 28416.5                 | 0.623   | 1488              | 40                  |
| Low appetite     | 18279                   | 0.747   | 68                | 525                 | 49685                   | 0.741   | 1855              | 55                  |
| Nausea           | 11675                   | 0.384   | 58                | 433                 | 37538.5                 | 0.860   | 1555              | 49                  |
| Fever            | 20896.5                 | 0.054   | 81                | 594                 | 84154.5                 | 0.150   | 2519              | 74                  |
| Chills           | 29242                   | 0.050   | 108               | 614                 | 71373.5                 | 0.323   | 2661              | 58                  |

|              |        |       |    |     |        |       |      |    |
|--------------|--------|-------|----|-----|--------|-------|------|----|
| Blisters     | 84     | 0.139 | 8  | 32  | 77.5   | 0.095 | 118  | 3  |
| Red Welts    | 504.5  | 0.549 | 9  | 100 | 1557.5 | 0.193 | 307  | 8  |
| Lymphopathia | 5496.5 | 0.103 | 46 | 281 | 22497  | 0.175 | 1398 | 37 |
| Rash         | 1343.5 | 0.356 | 19 | 125 | 2637   | 0.992 | 351  | 15 |
| Myalgias     | 24250  | 0.811 | 82 | 582 | 71218  | 0.348 | 2148 | 62 |
| Skin Burning | 4649.5 | 0.241 | 28 | 293 | 13268  | 0.227 | 866  | 27 |
| Hair loss    | 277    | 0.765 | 10 | 59  | 1456.5 | 0.959 | 245  | 12 |

**Table S5. Illness description for the post-COVID syndrome across clusters and variants.** Clusters are labelled according to the profile found with the unsupervised algorithm. The number of individuals used to optimise the clusters within a variant (training sample) and the number of individuals classified with each cluster are presented. Median duration, in weeks, and interquartile range [IQR] presented per variant and optimised cluster. Main features and symptoms describe the highest ranked symptoms per cluster, based on z-scores values.

| SARS-CoV-2 variant | Clusters | Number individuals | Duration (weeks)  | Main features and symptoms                                                                                                                                                                                                                                                                      | Classification                                          |
|--------------------|----------|--------------------|-------------------|-------------------------------------------------------------------------------------------------------------------------------------------------------------------------------------------------------------------------------------------------------------------------------------------------|---------------------------------------------------------|
| Wild               | wild-A   | 138                | 24.0 [15.0; 40.8] | Symptoms groups: cardiorespiratory, central neurological (anosmia) and upper respiratory (dyspnoea). High prevalence of dysosmia. Persistent cough as the most relevant symptom (highest z-score).                                                                                              | Predominantly cardiorespiratory                         |
|                    | wild-B   | 60                 | 27.5 [15.0; 48.3] | Symptoms groups: systemic/inflammatory, central neurological, upper respiratory, and immune-related/cutaneous. Severe symptoms, namely severe dyspnoea for longer than 12 weeks. High prevalence of systemic symptoms. Unique cluster with immune-related symptoms. Most heterogeneous cluster. | Systemic/inflammatory                                   |
|                    | wild-C   | 38                 | 15.0 [13.0; 30.8] | Symptoms groups: upper respiratory, central neurological and systemic/inflammatory. Hoarse voice as the most relevant symptom (highest z-score). High prevalence of anosmia, with almost neglectable z-score.                                                                                   | Predominantly respiratory                               |
|                    | wild-D   | 37                 | 22.0 [15.0; 49.0] | Symptoms groups: upper respiratory, central neurological and abdominal. Diarrhoea and sore throat are the most relevant symptoms (highest z-score). High prevalence of neurological symptoms.                                                                                                   | Predominantly central neurological with abdominal       |
|                    | Overall  | 273                | 23.0 [15.0; 43.0] | Three main clusters: (1) with cardiorespiratory symptoms, (2) systemic/inflammatory and (3) central neurological. Abdominal and cutaneous symptoms isolated in singular clusters, with high relevance but lower prevalence.                                                                     | ---                                                     |
| Alpha              | alpha-A  | 43                 | 18.0 [14.0; 35.0] | Symptoms groups: upper respiratory, central neurological and cardiorespiratory. Anosmia is the most relevant symptom. High prevalence of central neurological symptoms.                                                                                                                         | Central neurological                                    |
|                    | alpha-B  | 28                 | 16.5 [14.0; 28.8] | Symptoms groups: upper respiratory, central neurological and cardiorespiratory. Persistent cough is the most relevant symptom, followed by dyspnoea. High prevalence of respiratory symptoms and persistent cough.                                                                              | Predominantly upper respiratory with cardiorespiratory. |
|                    | alpha-C  | 23                 | 22.0 [15.5; 55.0] | Symptoms groups: upper respiratory, central neurological, systemic/inflammatory and abdominal. Strong relevance of respiratory symptoms, followed by systemic symptoms. High prevalence of respiratory symptoms and persistent cough.                                                           | Predominantly upper respiratory with systemic.          |
|                    | alpha-D  | 17                 | 17.0 [14.0; 43.0] | Symptoms groups: upper respiratory, systemic/inflammatory and immune-related/cutaneous. Strong relevance of respiratory symptoms, followed by immune-related symptoms. High prevalence of systemic and immune-related symptoms.                                                                 | Predominantly immune-related/cutaneous with systemic.   |
|                    | alpha-E  | 16                 | 23.0 [13.7; 41.0] | Symptoms groups: upper respiratory, systemic/inflammatory, immune-related/cutaneous, cardiorespiratory and central neurological. Strong relevance of immune-related symptoms, namely blisters.                                                                                                  | Predominantly mild symptoms.                            |

|                |           |     |                      |                                                                                                                                                                                                                                                                                                        |                                                                                     |
|----------------|-----------|-----|----------------------|--------------------------------------------------------------------------------------------------------------------------------------------------------------------------------------------------------------------------------------------------------------------------------------------------------|-------------------------------------------------------------------------------------|
|                |           |     |                      | High prevalence of mild fatigue.<br>Highly heterogeneous cluster.                                                                                                                                                                                                                                      |                                                                                     |
|                | alpha-F   | 15  | 18.0 [14.5;<br>37.5] | Symptoms groups: upper respiratory, systemic/inflammatory, abdominal and central neurological.<br>Strong relevance of systemic/inflammatory followed by neurological.<br>High prevalence of central neurological and systemic symptoms.                                                                | Predominantly central neurological with systemic/inflammatory.                      |
|                | alpha-G   | 13  | 21.0 [15.0;<br>44.0] | Symptoms groups: upper respiratory, systemic/inflammatory, immune-related, abdominal and cardiorespiratory.<br>Strong relevance of cardiorespiratory, followed by immune-related symptoms.<br>High prevalence of cardiorespiratory symptoms.                                                           | Multi-systemic with the predominance of cardiorespiratory symptoms.                 |
|                | Overall   | 159 | 18.0 [14.0;<br>43.5] | Three main clusters: (1) with cardiorespiratory symptoms, (2) systemic/inflammatory and immune-related and (3) central neurological.<br>Abdominal symptoms influence mostly the smaller cluster and immune-related symptoms are highly prevalent in clusters with systemic symptoms.                   | ---                                                                                 |
| Delta          | v-delta-A | 431 | 18.0 [14.0;<br>24.0] | Symptoms groups: central neurological.<br>Strong relevance of anosmia with high prevalence.                                                                                                                                                                                                            | Central neurological                                                                |
|                | v-delta-B | 142 | 19.0 [14.0;<br>23.8] | Symptoms groups: upper respiratory, systemic/inflammatory, immune-related, and central neurological.<br>Strong relevance immune-related symptoms, namely blisters.<br>High prevalence of upper respiratory and central neurological symptoms.                                                          | Predominantly upper respiratory with central neurological.                          |
|                | v-delta-C | 123 | 18.0 [14.0;<br>23.0] | Symptoms groups: upper respiratory, systemic/inflammatory, central neurological and cardiorespiratory.<br>Strong relevance of upper respiratory, followed by cardiorespiratory.<br>High prevalence of mild fatigue.                                                                                    | Multi-systemic with a predominance of mild fatigue, upper respiratory and headache. |
|                | v-delta-D | 107 | 20.0 [16.0;<br>25.0] | Symptoms groups: upper respiratory, systemic/inflammatory, central neurological and immune-related/cutaneous.<br>Strong relevance of immune-related, followed by systemic/inflammatory.<br>High prevalence of mild fatigue and neurological symptoms.                                                  | Predominantly immune-related with central neurological and systemic.                |
|                | v-delta-E | 80  | 20.0 [16.8;<br>28.3] | Symptoms groups: upper respiratory, systemic/inflammatory, immune-related/cutaneous, abdominal and cardiorespiratory.<br>Strong influence of cardiorespiratory symptoms and severe dyspnoea.<br>High prevalence of mild fatigue and neurological symptoms.                                             | Severe symptoms                                                                     |
| All population | Overall   | 883 | 19.0 [15.0;<br>24.0] | Three main clusters: (1) with cardiorespiratory symptoms – severe symptoms, (2) systemic/inflammatory and immune-related and (3) central neurological.<br>Abdominal symptoms influence mostly the smaller cluster and immune-related symptoms are highly prevalent in clusters with systemic symptoms. | ---                                                                                 |



**Figure S4. Spearman correlation matrix self-reported symptoms.** The correlation matrix was computed using the aggregated symptoms (sum of symptoms per week, for each individual) for wild-type unvaccinated subjects (A), alpha variant unvaccinated individuals (B) and delta variant vaccinated individuals (C). Red encodes positive correlations, and blue corresponds to negative correlations.

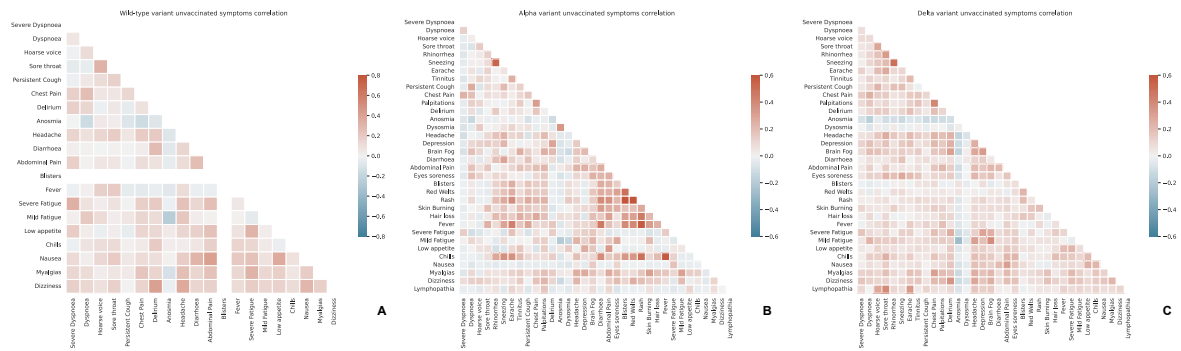

Most of the symptoms introduced later in the app, used to characterise the alpha and delta variants, are positively correlated with symptoms included in the initial list. Examples of that are palpitations highly correlated with chest pain, brain fog highly correlated with central neurological, and immune-related symptoms such as rashes correlated with blisters for both the latest variants of the virus. Note that such symptoms also belong to the same group of symptoms. Other new symptoms are also correlated with initially existing ones, suggesting that new symptoms only added more granularity to the initial 20 symptoms.

**Figure S5. Symptom prevalence and duration for subjects reporting PCS.** Median duration of symptoms, in weeks, for subjects reporting infection before vaccination (unvaccinated – hollowed bars; subsequently vaccinated – filled bars; interquartile range (IQR) represented by the black lines; green: wild-type variant; yellow: alpha variant; red: delta variant).

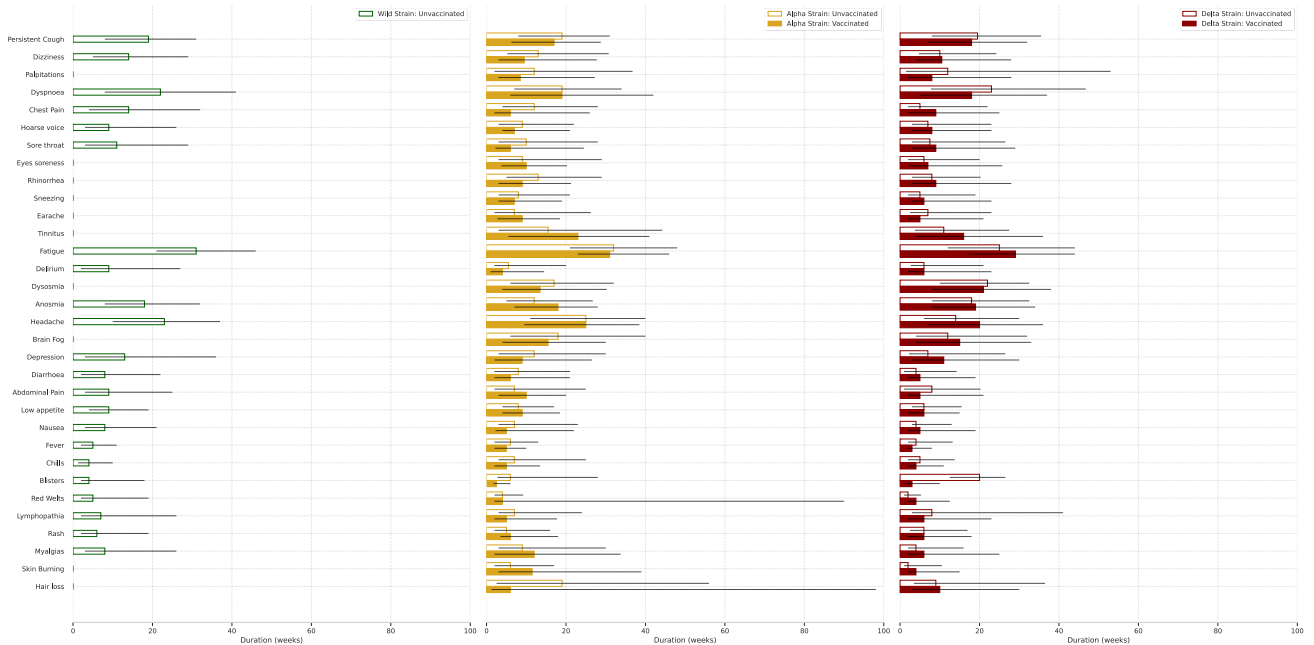

**Figure S6. Optimisation of BIC to select the best number of clusters per SARS-CoV-2 variant.** A: Bootstrapping analysis for 50 randomly selected populations for training and testing set, for wild-type variant. B: Bootstrapping analysis for 20 randomly selected populations for training for alpha (left panel) and delta (right panel) variants. Panel B assesses the robustness of the optimised number of clusters. Given early convergence and a smaller sample to bootstrap (small sample size of CSSB sample with both alpha- and delta variants), only 20 runs were performed. No formal testing was performed for these samples.

**A: Wild-type training, 50 runs**

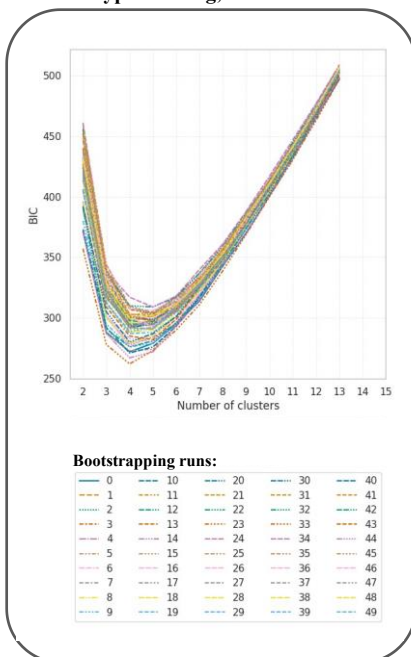

**B: alpha-type and delta-type training, 20 runs**

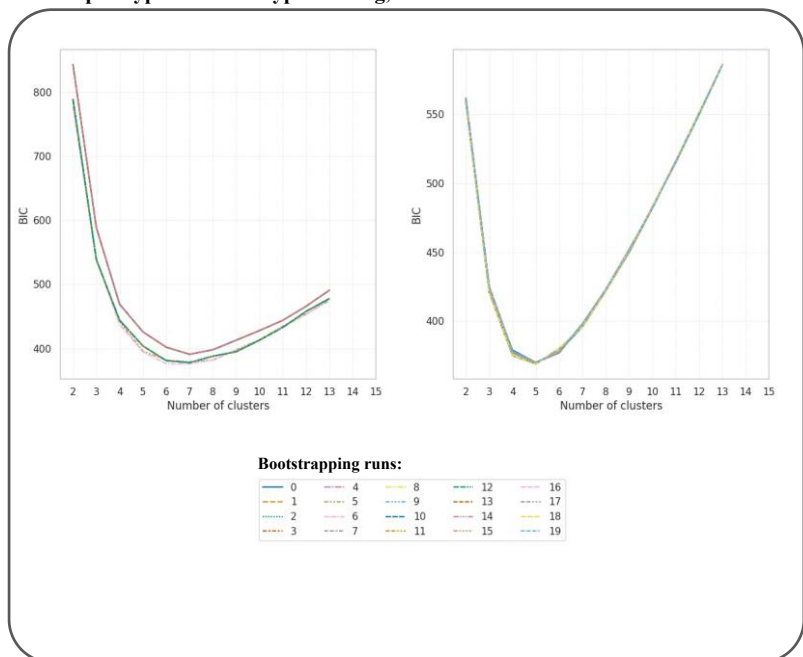

**Figure S7. Significance analysis of symptoms profiles per cluster for the wild-type variant of the virus, for symptomatic disease longer than 12 weeks.**

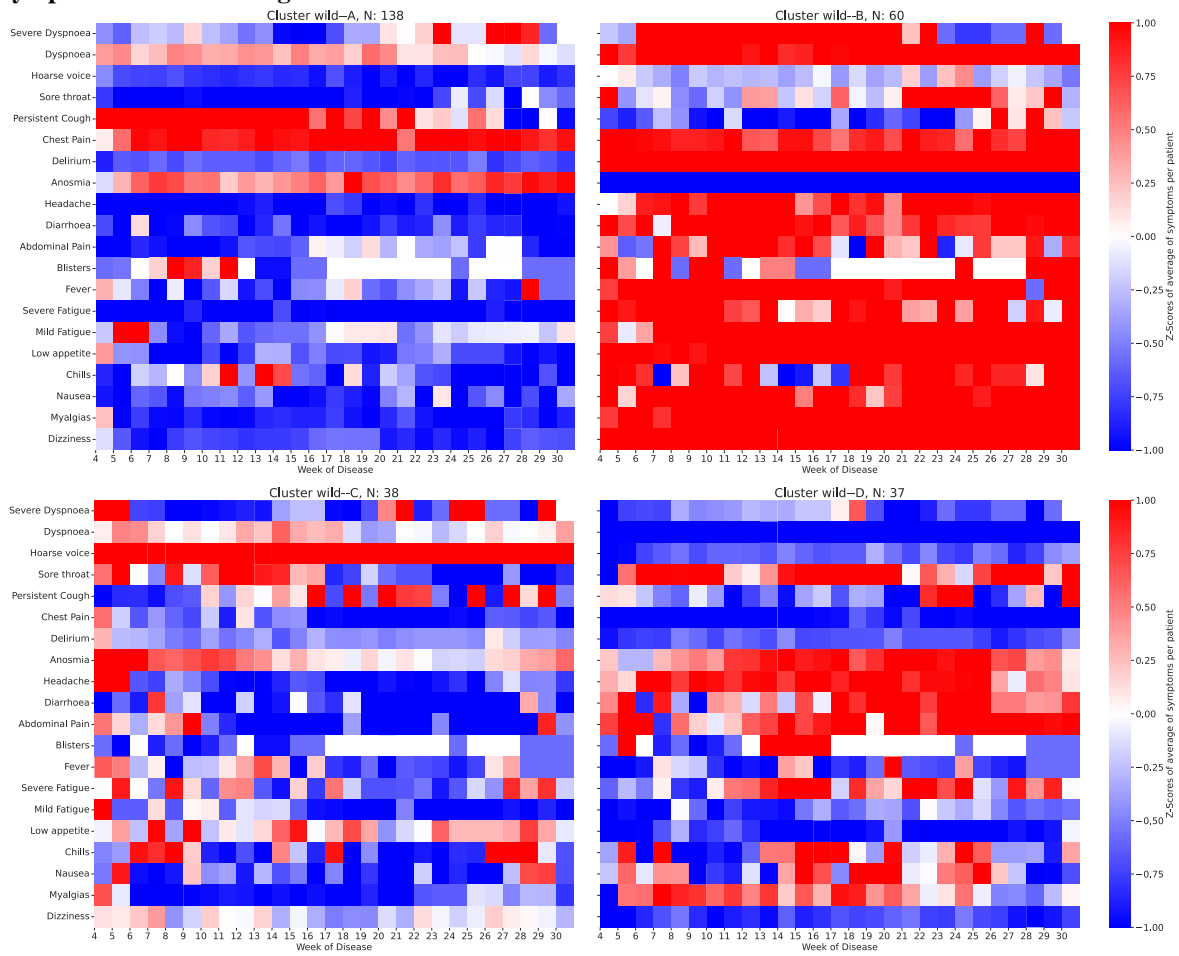

**Figure S8. Demographic profile per cluster for the wild-type variant of the virus, for symptomatic disease longer than 12 weeks. A: Body Mass Index (BMI) in  $\text{kg}/\text{m}^2$ ; B: Age in years. The diamond ( $\blacklozenge$ ) encodes outliers. Mann-Whitney test was conducted to assess statistical differences,  $\alpha = 0.05$ .**

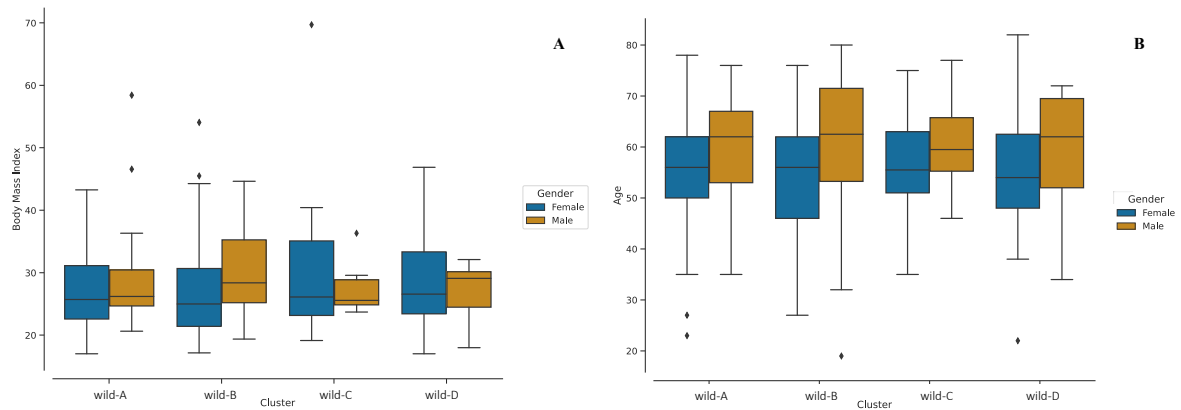

**Figure S9. Individual profile for the clusters optimised for the wild-type variant for subjects with the symptomatic disease for longer than 12 weeks.** The duration of each symptom is presented by the colour bar. The grey dots encode the average duration of each symptom for the population labelled with each cluster. The gradient colours encode the prevalence of the symptoms per week – darker encodes a higher prevalence of the symptom. Median prevalence across weeks is used to encode the symptom prevalence.

**Individual symptoms profiling**

Duration of the symptoms in weeks.  
Cluster: wild-A

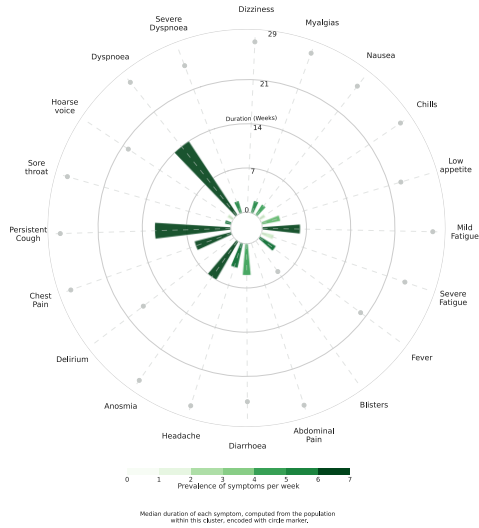

**Individual symptoms profiling**

Duration of the symptoms in weeks.  
Cluster: wild-B

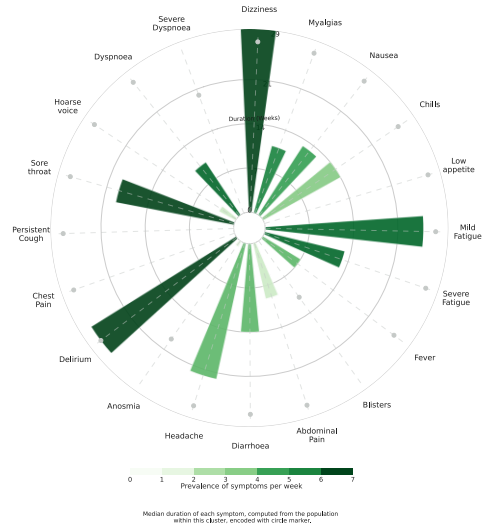

**Individual symptoms profiling**

Duration of the symptoms in weeks.  
Cluster: wild-C

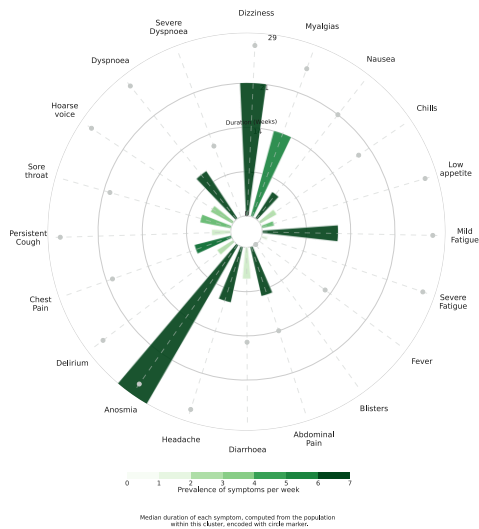

**Individual symptoms profiling**

Duration of the symptoms in weeks.  
Cluster: wild-D

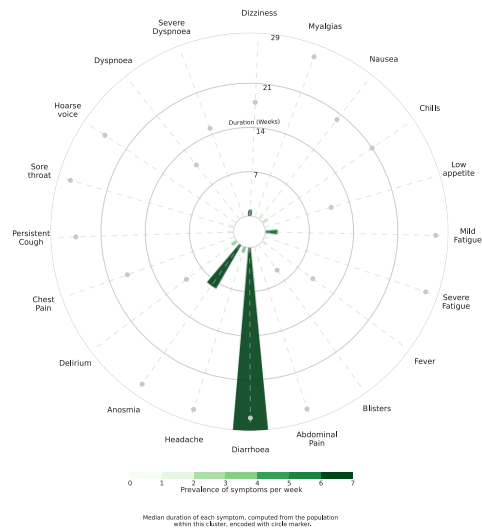

**Figure S10. Symptom prevalence profile for PCS clusters for unvaccinated subjects infected with the alpha variant.** The proportion of subjects reporting each symptom (ratio) per week is encoded by the colourmap (darker represents a higher ratio).

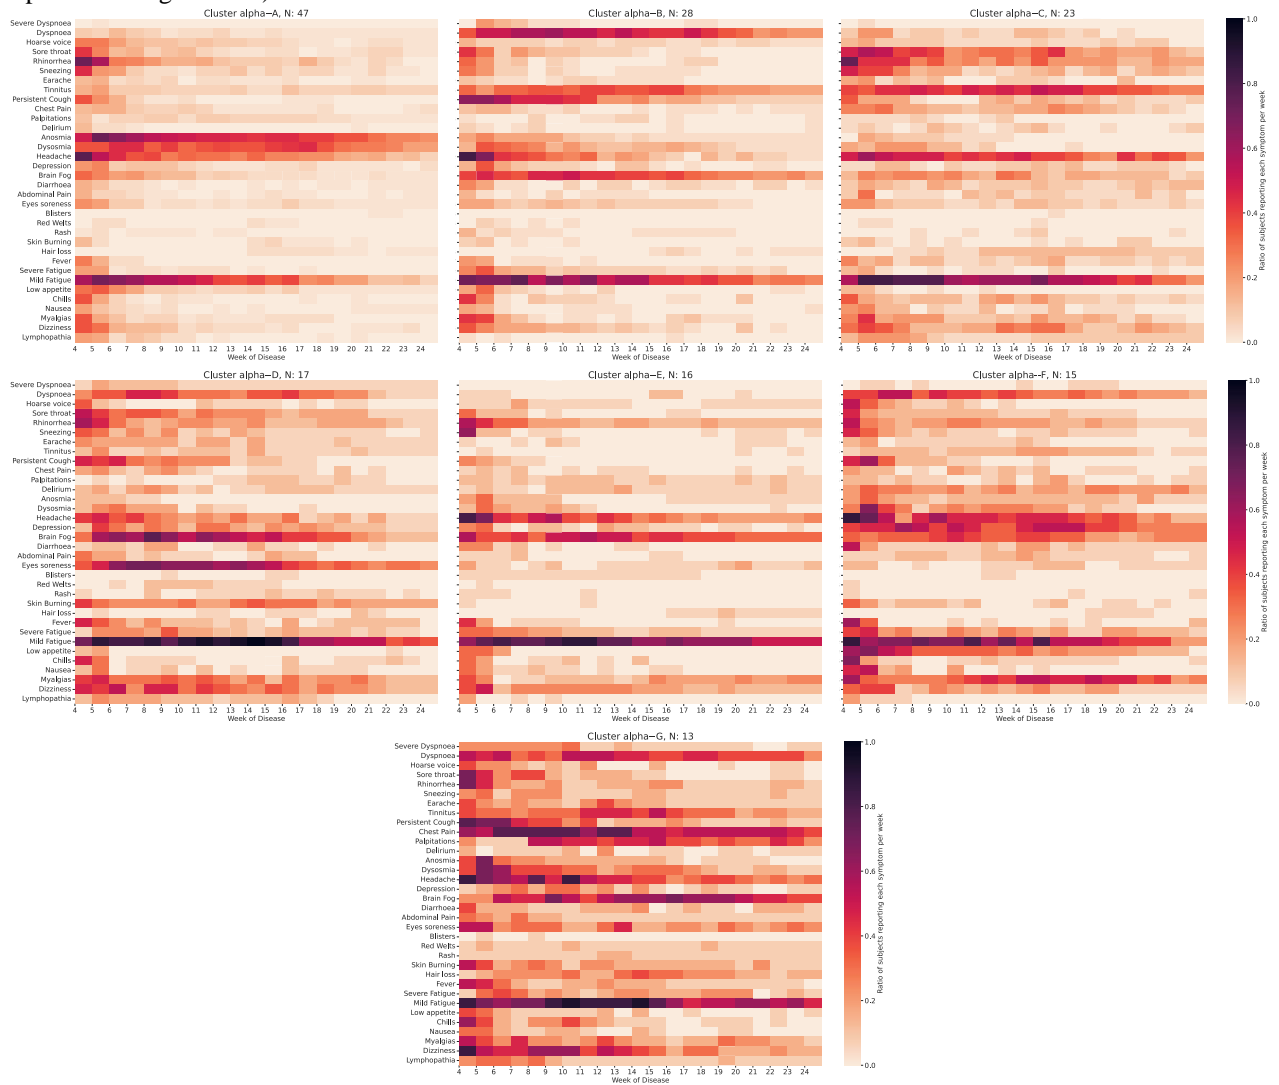

**Figure S11. Significance analysis of symptoms profiles per cluster for the alpha variant of the virus, for symptomatic disease longer than 12 weeks.**

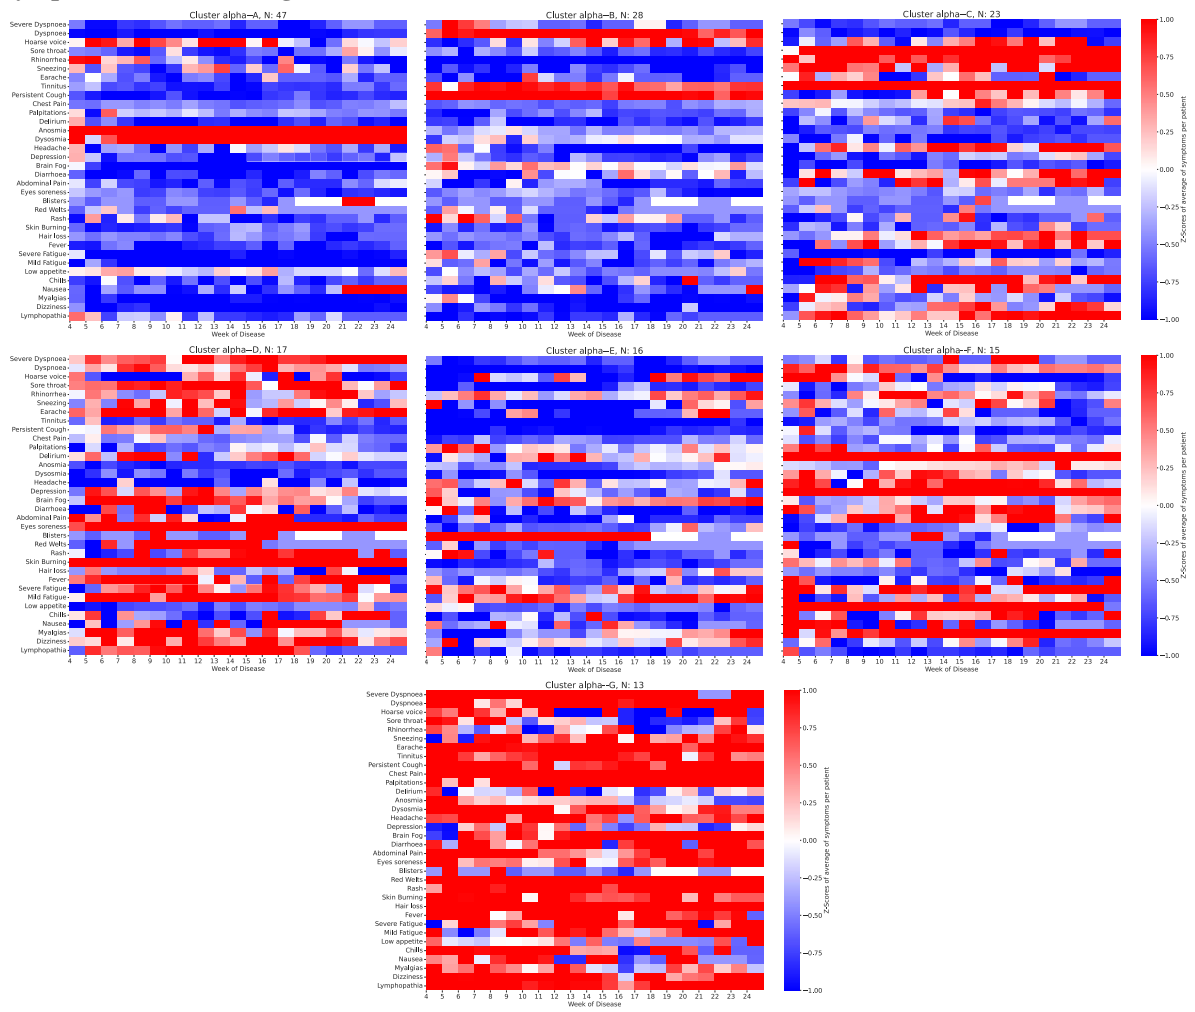

**Figure S12. Individual profile for the clusters optimised for the unvaccinated alpha variant for subjects with the symptomatic disease for longer than 12 weeks.** The duration of each symptom is presented by the colour bar. The grey dots encode the average duration of each symptom for the population labelled with each cluster. The gradient colours encode the prevalence of the symptoms per week – darker encodes a higher prevalence of the symptom. Median prevalence across weeks is used to encode the symptom prevalence.

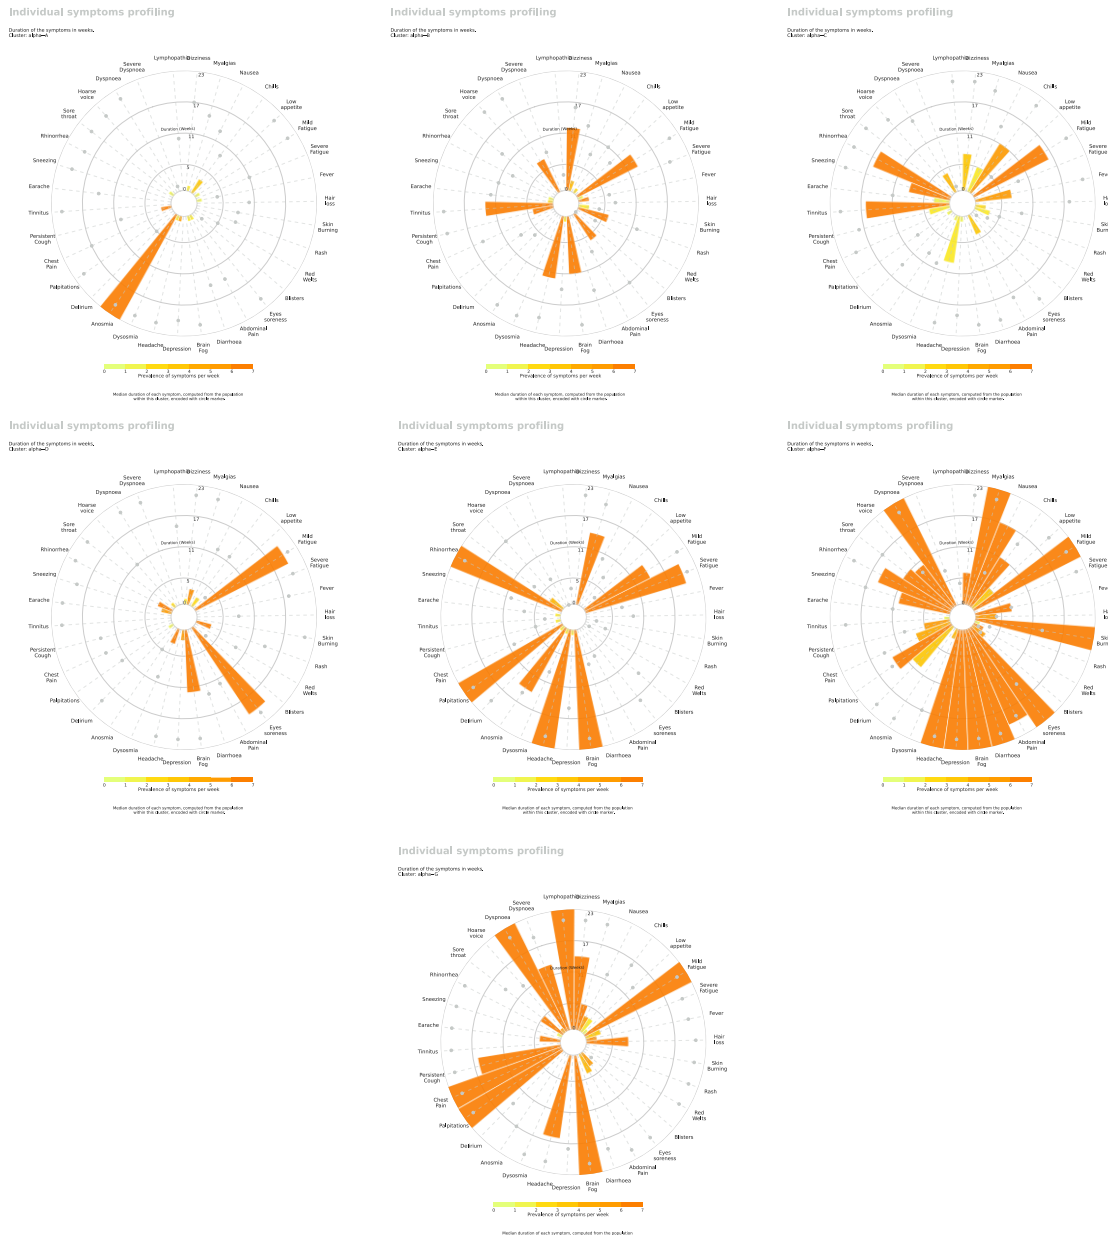

**Figure S13. Demographic profile per cluster for the unvaccinated alpha variant of the virus, for symptomatic disease longer than 12 weeks.** A: Body Mass Index (BMI) in  $\text{kg}/\text{m}^2$ ; B: Age in years. The diamond ( $\blacklozenge$ ) encodes outliers. Mann-Whitney test was conducted to assess statistical differences,  $\alpha = 0.05$ .

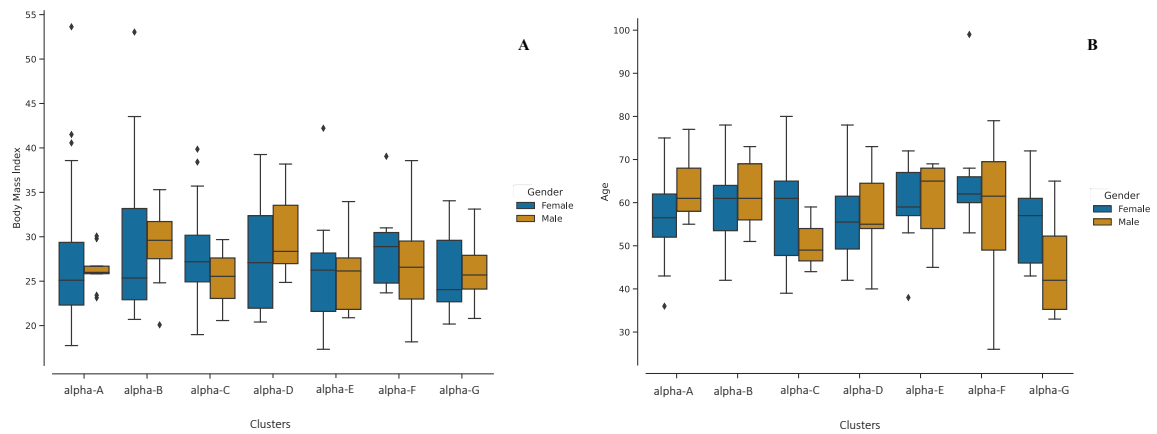



**Figure S14. Symptom prevalence profile for PCS clusters for vaccinated individuals infected with the delta variant.** The proportion of subjects reporting each symptom (ratio) per week is encoded by the colourmap (darker represents a higher ratio).

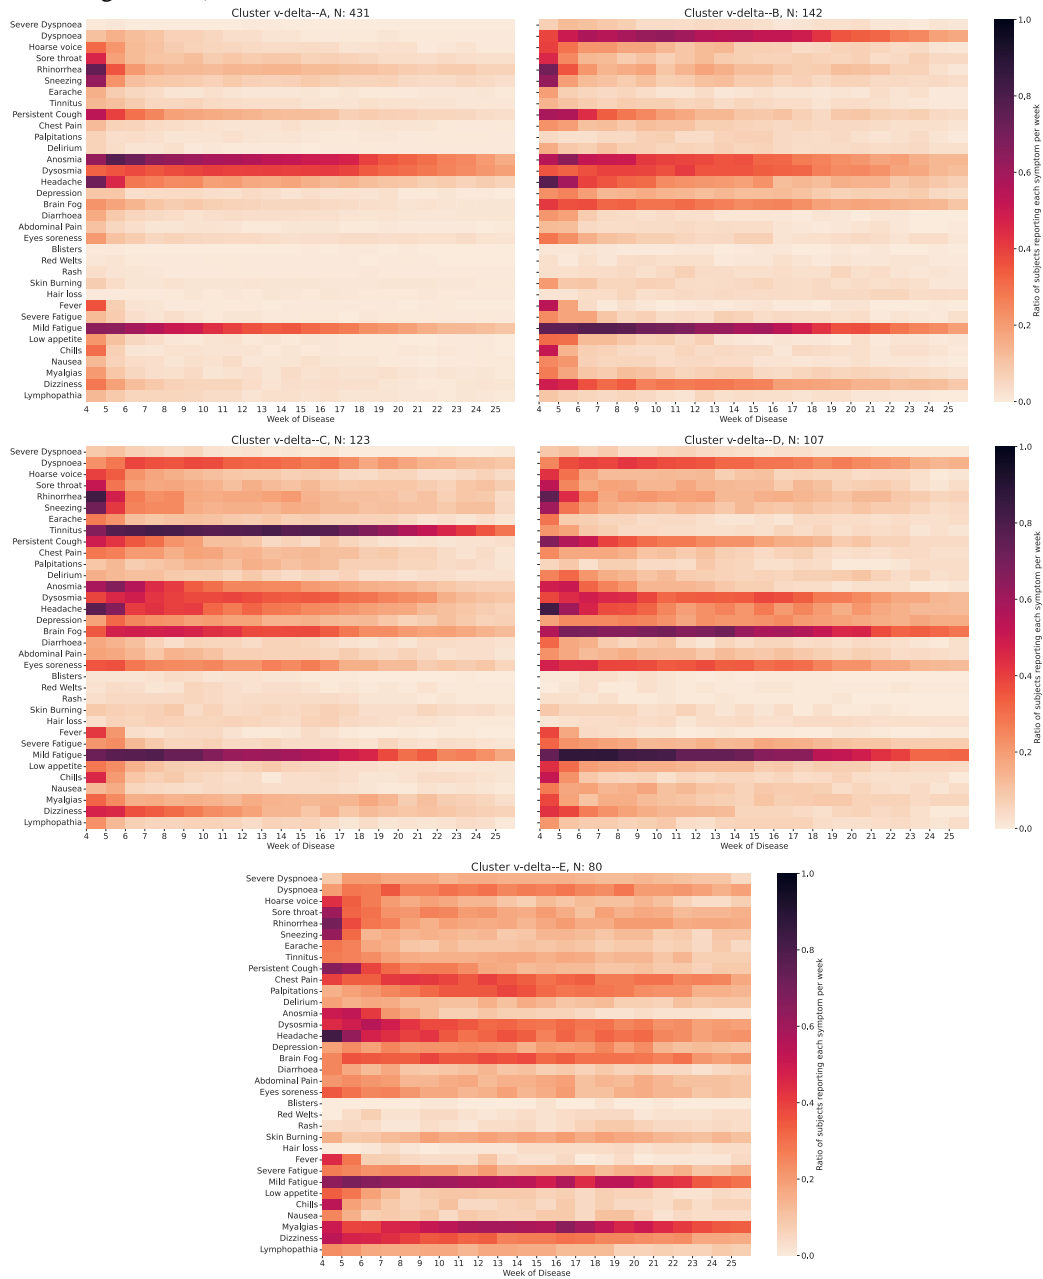

**Figure S15. Significance analysis of symptoms profiles per cluster for the vaccinated delta variant of the virus, for symptomatic disease longer than 12 weeks, for vaccinated subjects.**

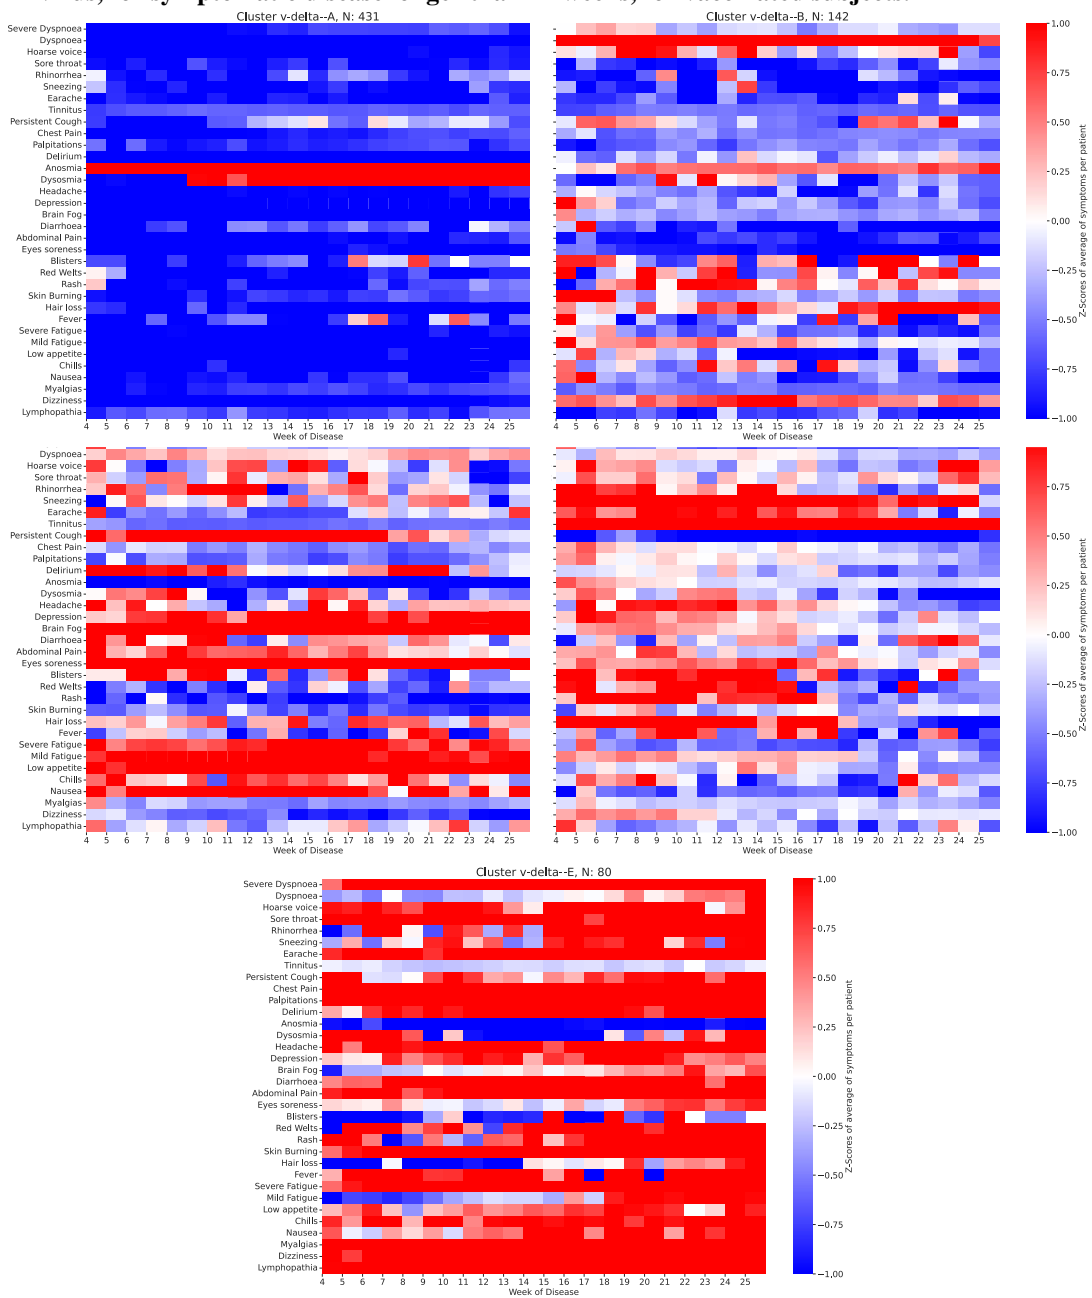

**Figure S16. Individual profile for the clusters optimised for vaccinated delta variant for subjects, who were infected after vaccination, with symptomatic lasting for longer than 12 weeks.** The duration of each symptom is presented by the coloured bar. The grey dots encode the average duration of each symptom for the population labelled with each cluster. The gradient colours encode the prevalence of the symptoms per week – darker encodes a higher prevalence of the symptom. Median prevalence across weeks is used to encode the symptom prevalence.

Individual symptoms profiling

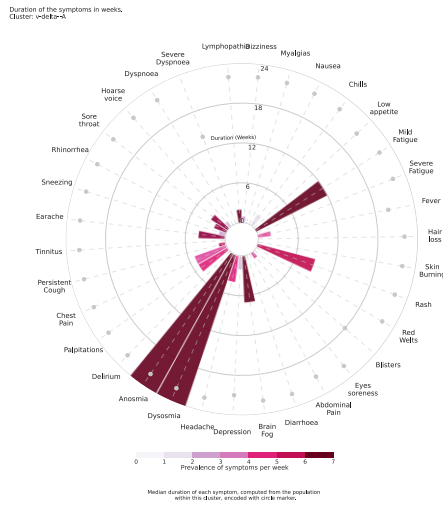

Individual symptoms profiling

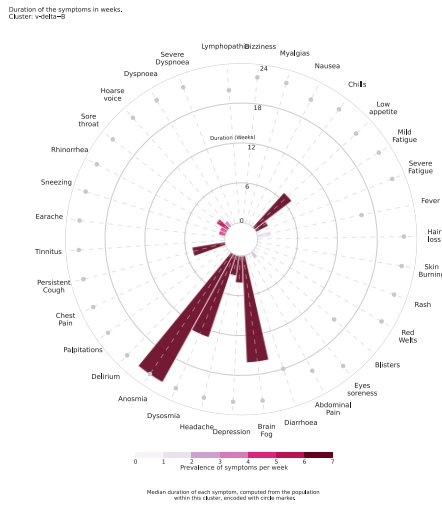

Individual symptoms profiling

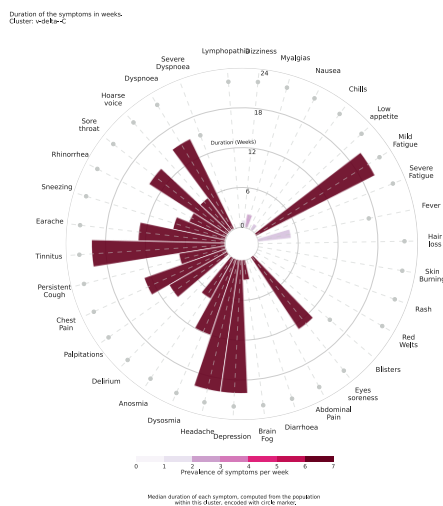

Individual symptoms profiling

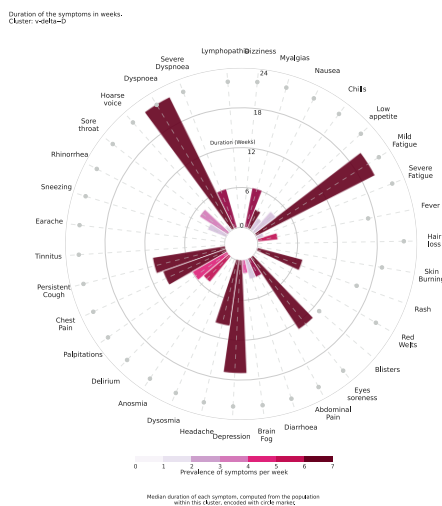

Individual symptoms profiling

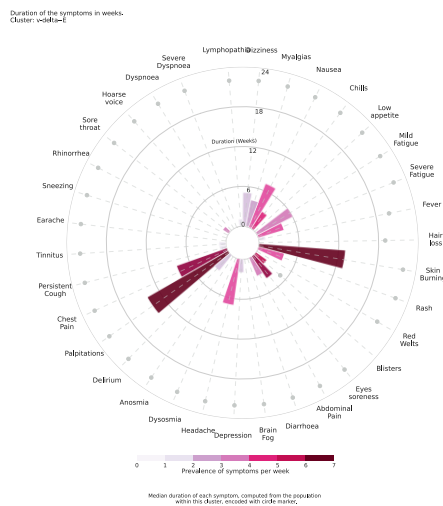

**Figure S17. Demographic profile per cluster for the vaccinated delta variant of the virus, for symptomatic disease longer than 12 weeks.** A: Body Mass Index (BMI) in kg/m<sup>2</sup>; B: Age in years. The diamond (♦) encodes outliers. Mann-Whitney test was conducted to assess statistical differences, alpha = 0.05. Asterisk (\*) denotes statistical significance.

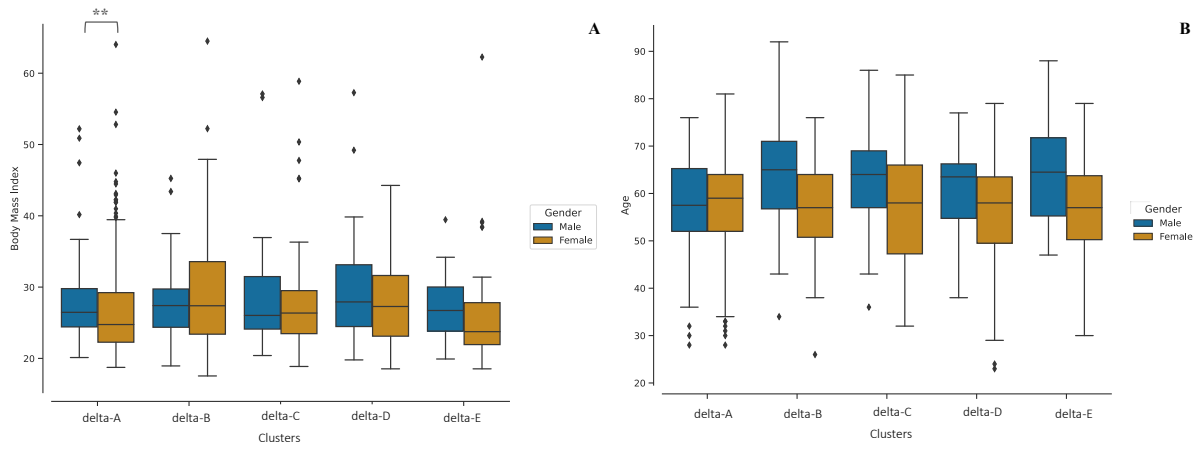

**Figure S18. Comorbidity profile per cluster for the three variants of the virus, for symptomatic disease longer than 12 weeks.**

**Wild Variant**

Prevalence of comorbidities within each cluster.  
Clusters size:

- A: 138
- B: 60
- C: 38
- D: 37

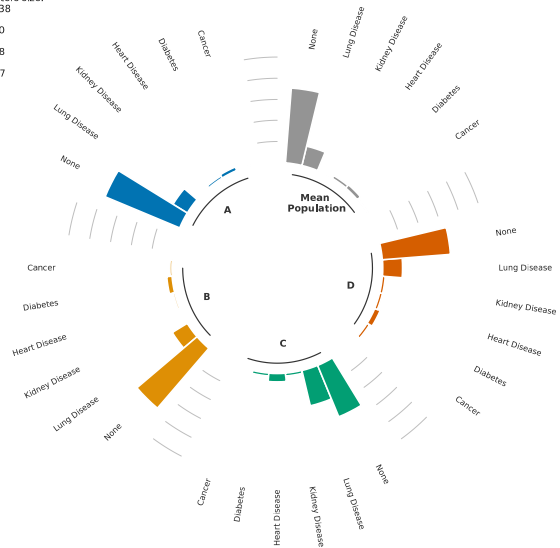

Mean Population: Mean prevalence of comorbidity in the population, independently from the cluster.

**Alpha Variant**

Prevalence of comorbidities within each cluster.  
Clusters size:

- A: 47
- B: 28
- C: 23
- D: 17
- E: 16
- F: 15
- G: 13

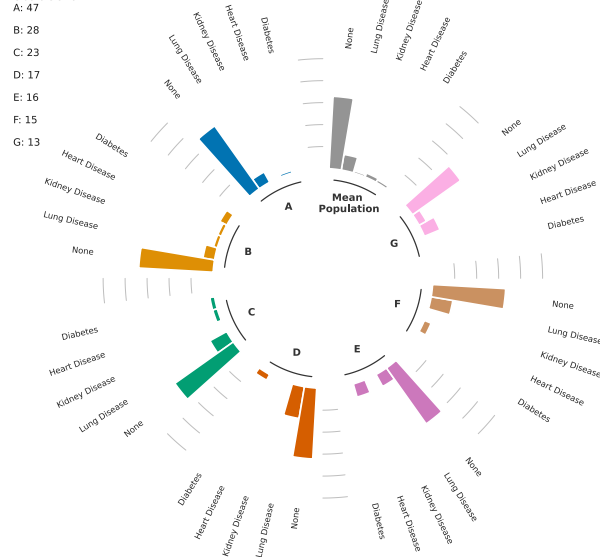

Mean Population: Mean prevalence of comorbidity in the population, independently from the cluster.

**Delta Variant**

Prevalence of comorbidities within each cluster.  
Clusters size:

- A: 431
- B: 142
- C: 123
- D: 107
- E: 80

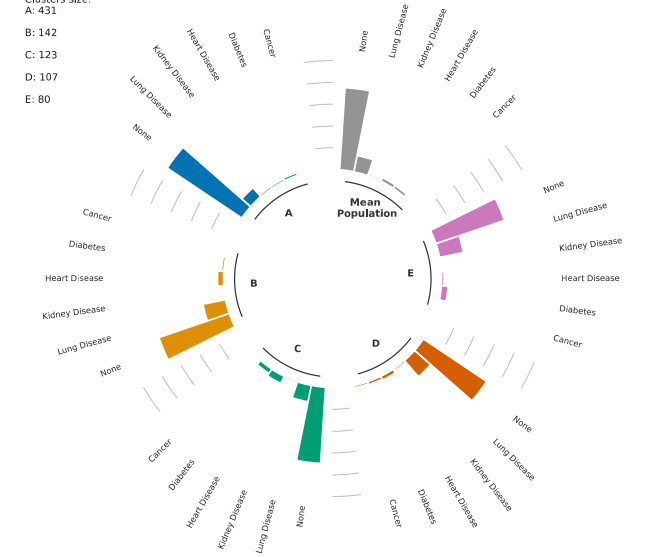

Mean Population: Mean prevalence of comorbidity in the population, independently from the cluster.

**Figure S19. Symptom prevalence profile for the cluster prediction for the independent sample composed unvaccinated individuals infected by the wild-type variant with symptomatic illness for longer than 12 weeks.** The proportion of subjects reporting each symptom (ratio) per week is encoded by the colourmap (darker represents higher ratio).

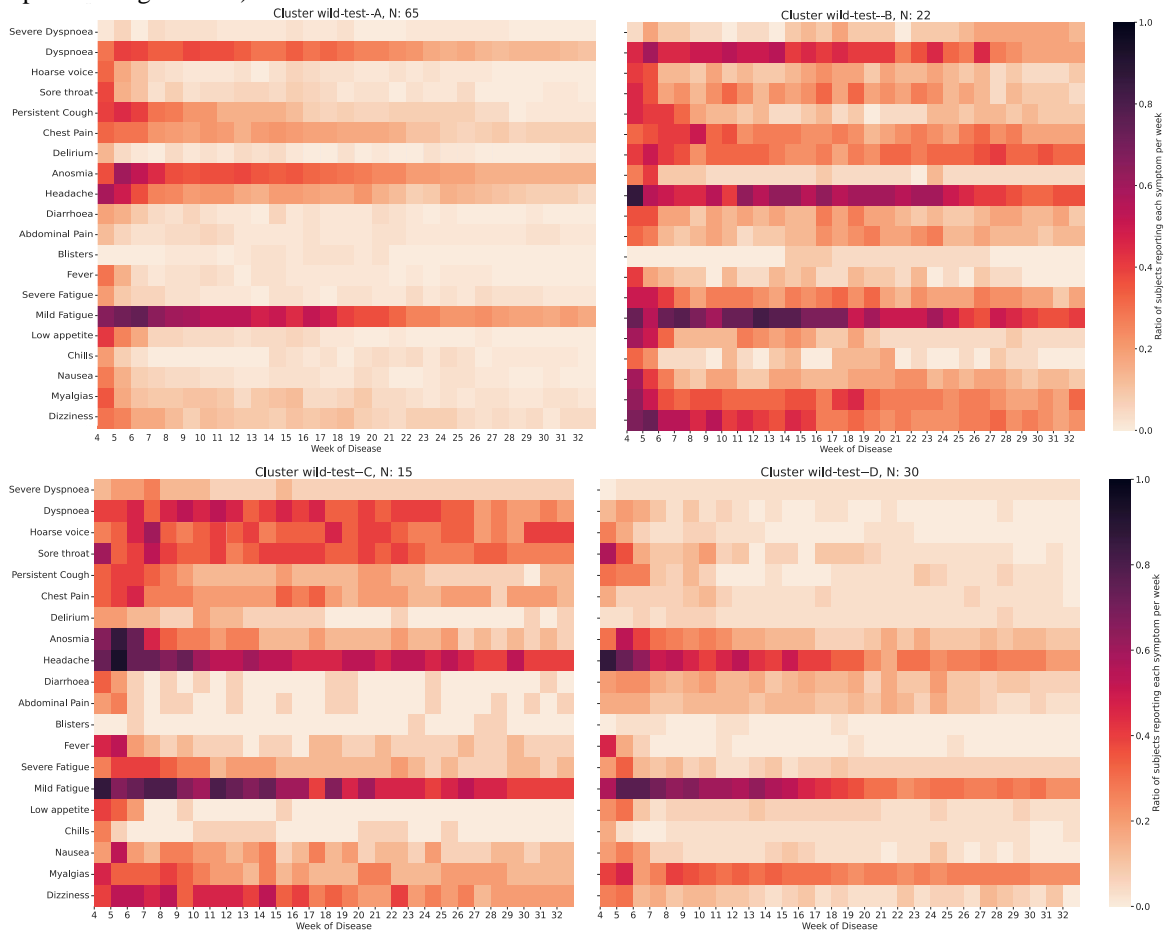

**Figure S20. Robustness evaluation of the clusters for wild-type.** A: Confusion matrix between the predicted labels of the testing set using the model trained on the training set (wild-type), and the re-trained model on the testing set. The predicted cluster refers to the re-trained model on the testing set, while the actual cluster refers to the labels predicted with the originally trained model. B: Similarity matrix between the symptom profile of the predicted clusters (wild-type variant) and the symptom profile of the training set (wild-type variant). Median ratio of individuals reporting a symptom across illness is used to identify the top symptoms per cluster in the testing set (right column). The Euclidian distance between the top four (20%) symptom profile per testing cluster and equivalent symptom profile per training cluster is computed as similarity measure. Small differences identify the best matching symptom profile during the illness.

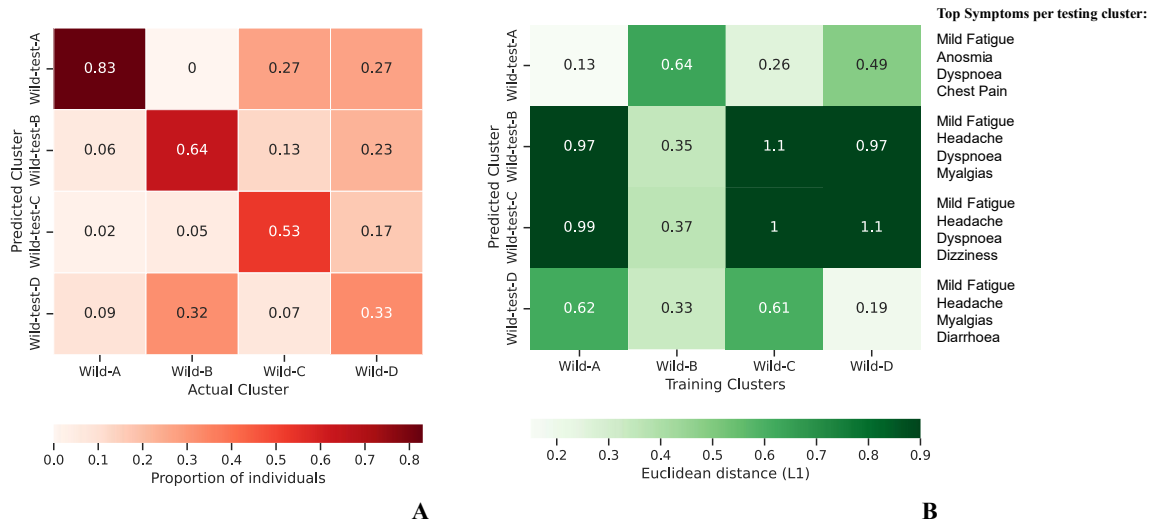

Supplement: mmc1.pdf [file mmc1.pdf]
